# Supplementary material for: Mechanism by which micro-nano bubbles impact biofilm growth in drinking water distribution systems
Source: Royal Society of Chemistry journal article supplement (doi:10.1039/d4ew00704b), 2025-01-01
Supplement: d4ew00704b1.pdf [file d4ew00704b1.pdf]

## Effect of micro and nano bubble on biofilm in drinking water distribution systems

Luo Aibao<sup>1</sup>, WANG Tianzhi<sup>1,2,\*</sup>, Luo Peiyuan<sup>1</sup>, Zhiwei Zheng<sup>4</sup>, Fiallos  
Manuel<sup>1</sup>, Bian Yongning<sup>1,2</sup>, Soon-Thiam Khu<sup>1,3</sup>

1. School of Environmental Science & Engineering, Tianjin University, Tianjin 300350, China

2. Tianjin key Laboratory of Pollution Prevention- Control and Carbon Sink along land-sea waters,  
Tianjin 300350, China

3. Engineering Research Center of City intelligence and Digital Governance, Ministry  
of Education of the People's Republic of China, Tianjin 300350, China

4. College of Water Conservancy Engineering, Tianjin Agricultural University, Tianjin 300392,  
China

\*Corresponding author, E-mail: wangtianzhi@tju.edu.cn

### 1. Calculation of the bubble concentration in the micro-nanobubbles

$$C = N \frac{S_{Si} \times 1000}{S \times V} \quad (1)$$

Assuming that the sample is fully laid on a silicon wafer: N denotes the number of micro-nanobubbles observed under the optical microscope;  $S_{Si}$  denotes the total area of the observed sample  $\text{cm}^2$ ; S denotes the total area of the actual observation under the objective lens  $\text{cm}^2$ ; V is the volume of micro-nanobubbles water taken  $\mu\text{L}$ ; C is the concentration of bubbles in the water (pcs/mL).

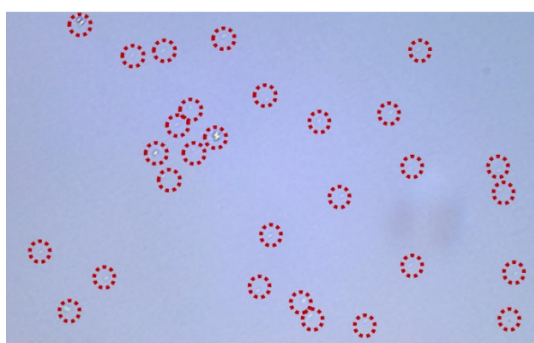

Oxy:  $2.42 \times 10^5$  MNBs/mL

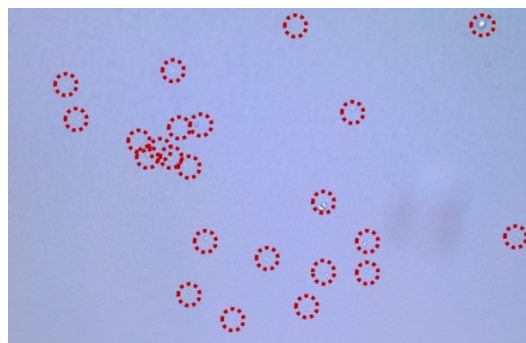

Air:  $1.92 \times 10^5$  MNBs/mL

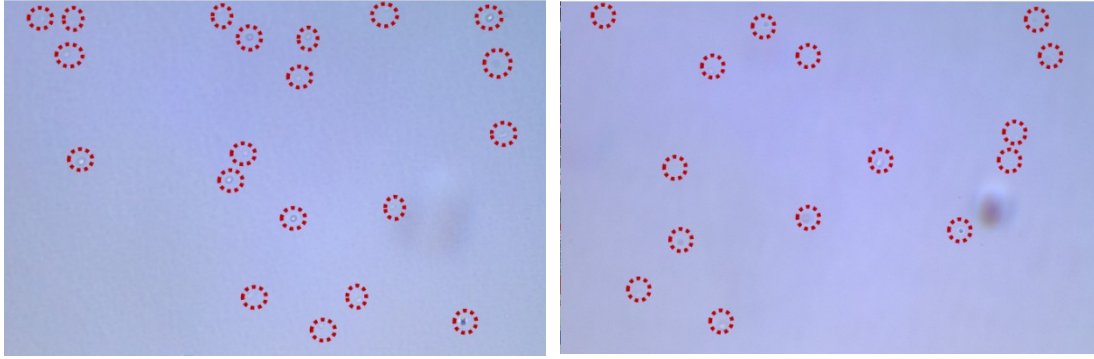

Ozo:  $1.67 \times 10^5$  MNBs/mL

Nit:  $1.25 \times 10^5$  MNBs/mL

## 2. Fractal dimension calculation method (Posadas A N D,2003)

This paper analyzes and calculates the fractal dimension of biofilm surface structure using the Islet method. The Islet method defines the fractal dimension based on a measurement relationship and can be obtained by the Mandelbrot states [1]. It can be calculated as follows.

$$\alpha_D(\varepsilon) = \frac{L^{\frac{1}{D}}(\varepsilon)}{A^{\frac{1}{2}}(\varepsilon)} \quad (1)$$

Where L is the pore perimeter; A is the pore area; D is the fractal dimension;  $\varepsilon = \eta / L_0$ , where  $\eta$  is the absolute measurement scale and  $L_0$  is the perimeter of the initial graph; with a fixed scale  $\eta$ ,  $\alpha_D(\varepsilon)$  is a constant, and  $\alpha_D(\varepsilon)$  is only related to the chosen scale, but not to the size of the graph. Then both sides of the above equation are taken logarithmically to obtain:

$$\log L(\varepsilon) = D \log \alpha_D(\varepsilon) + \frac{D}{2} \log A(\varepsilon) + \frac{D}{2} \log A(\varepsilon) \quad (2)$$

Where C is a constant. The perimeter and area of each pore were measured separately in the electron microscope picture of the biofilm surface structure, and twice the slope obtained from double logarithmic plotting of area and perimeter is the value of the fractal dimension D.

Posadas A N D, Giménez D, Quiroz R, et al. Multifractal characterization of soil pore spatial distributions. Soil Science Society of America Journal. 2003, 67: 1361-1369.

Table S1. Key strains of biofilm microbial communities under different air source conditions obtained by topological analysis

|        | Domain             | Kingdom             | Phylum           | Class                                 |
|--------|--------------------|---------------------|------------------|---------------------------------------|
| OTU73  | d_Bacteria         | k_norank_d_Bacteria | p_Proteobacteria | c_Alphaproteobacteria                 |
| OTU147 | d_Bacteria         | k_norank_d_Bacteria | p_Proteobacteria | c_Alphaproteobacteria                 |
| OTU50  | d_Bacteria         | k_norank_d_Bacteria | p_Bacteroidota   | c_Bacteroidia                         |
| OTU107 | d_Bacteria         | k_norank_d_Bacteria | p_Proteobacteria | c_Gammaproteobacteria                 |
| OTU632 | d_Bacteria         | k_norank_d_Bacteria | p_Proteobacteria | c_Gammaproteobacteria                 |
|        | Order              | Family              | Genus            | Species                               |
| OTU73  | o_Caulobacteriales | f_Hyphomonadaceae   | g_SWB02          | s_uncultured_bacterium_g_SWB02        |
| OTU147 | o_Rhizobiales      | f_Hyphomicrobiaceae | g_Hyphomicrobium | s_unclassified_g_Hyphomicrobium       |
| OTU50  | o_Chitinophagales  | f_Chitinophagaceae  | g_Terrimonas     | s_unclassified_g_Terrimonas           |
| OTU107 | o_Pseudomonadales  | f_Moraxellaceae     | g_Acinetobacter  | s_Acinetobacter_lwoffii               |
| OTU632 | o_Burkholderiales  | f_Rhodocyclaceae    | g_Sulfuritalea   | s_uncultured_bacterium_g_Sulfuritalea |

Table S2. Throughput analysis of different gas sources for the regulation of biofilm growth at different growth stages

| GP    |   |       |                              |                          |        |        |          |
|-------|---|-------|------------------------------|--------------------------|--------|--------|----------|
| X     | → | Y     | Non-standardized coefficient | Standardized coefficient | S.E.   | C.R.   | P        |
| ·OH   | → | NTU   | -0.009                       | -0.63                    | 0.005  | -1.815 | 0.069*   |
| Size  | → | P     | 0                            | -0.671                   | 0      | -2.025 | 0.043**  |
| NTU   | → | TOC   | -3.536                       | -0.889                   | 0.814  | -4.342 | 0.000*** |
| TOC   | → | PS    | 0.264                        | 1                        | 0.038  | 6.943  | 0.000*** |
| Zeta  | → | PS    | 0.005                        | 0.334                    | 0.002  | 2.319  | 0.020**  |
| P     | → | D     | 0.449                        | 0.911                    | 0.091  | 4.935  | 0.000*** |
| PS    | → | DW    | -2.48                        | -0.618                   | 1.411  | -1.758 | 0.079*   |
| MP    |   |       |                              |                          |        |        |          |
| X     | → | Y     | Non-standardized coefficient | Standardized coefficient | S.E.   | C.R.   | P        |
| ·OH   | → | TOC   | -3.778                       | -1.481                   | 0.479  | -7.881 | 0.000*** |
| Ace   | → | TOC   | -0.335                       | -0.929                   | 0.068  | -4.942 | 0.000*** |
| ·OH   | → | Ace   | -5.47                        | -0.773                   | 2.007  | -2.726 | 0.006*** |
| Chaos | → | PS    | -1.49                        | -0.814                   | 0.332  | -4.484 | 0.000*** |
| Ace   | → | PS    | -0.001                       | -0.635                   | 0      | -3.497 | 0.000*** |
| TOC   | → | EC    | 4.896                        | 0.834                    | 1.447  | 3.383  | 0.001*** |
| PS    | → | DW    | -17.332                      | -0.649                   | 9.084  | -1.908 | 0.056*   |
| Zeta  | → | P     | 0.005                        | 0.936                    | 0.001  | 5.927  | 0.000*** |
| Size  | → | NTU   | 0.001                        | 0.738                    | 0      | 2.449  | 0.014**  |
| SP    |   |       |                              |                          |        |        |          |
| X     | → | Y     | Non-standardized coefficient | Standardized coefficient | S.E.   | C.R.   | P        |
| ·OH   | → | TOC   | -3.246                       | -0.767                   | 1.216  | -2.67  | 0.008*** |
| ·OH   | → | Chaos | -0.004                       | -0.632                   | 0.002  | -1.824 | 0.068*   |
| Chaos | → | PN    | -1.023                       | -0.023                   | 20.318 | -0.05  | 0.960    |
| ·OH   | → | Ace   | 11.111                       | 0.779                    | 4.002  | 2.776  | 0.005*** |
| ·OH   | → | D     | 0.003                        | 0.446                    | 0.003  | 1.113  | 0.266    |
| Chaos | → | PS    | -1.635                       | -0.829                   | 0.494  | -3.314 | 0.001*** |
| PN    | → | DW    | 1.599                        | 0.941                    | 0.258  | 6.206  | 0.000*** |
| TOC   | → | NTU   | -0.024                       | -0.952                   | 0.003  | -6.943 | 0.000*** |

Note: \*\*\*, \*\*, and \* represent 1%, 5%, and 10% significance levels, respectively.

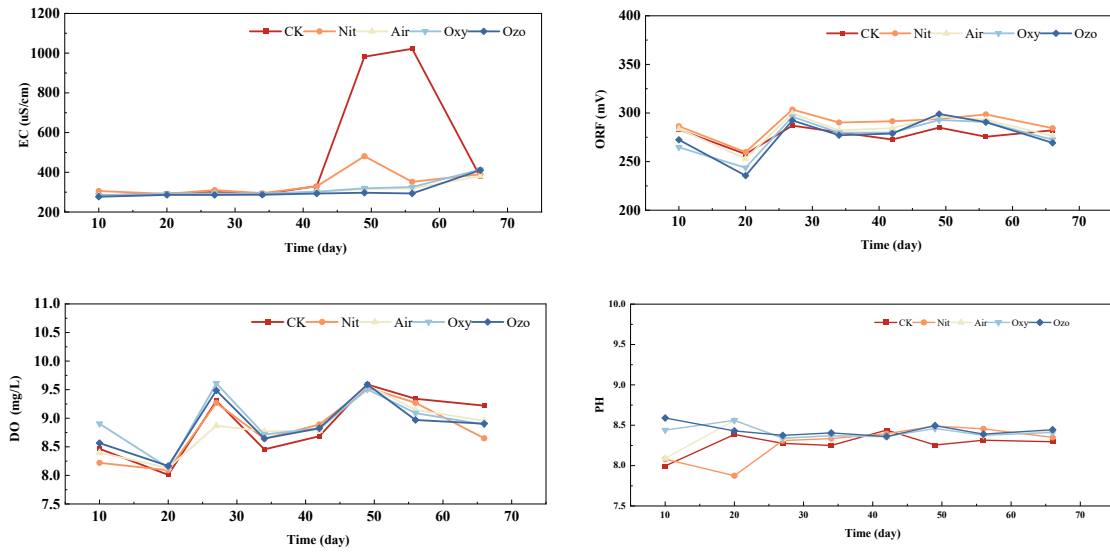

Figure S1. Water quality changes under different gas conditions.

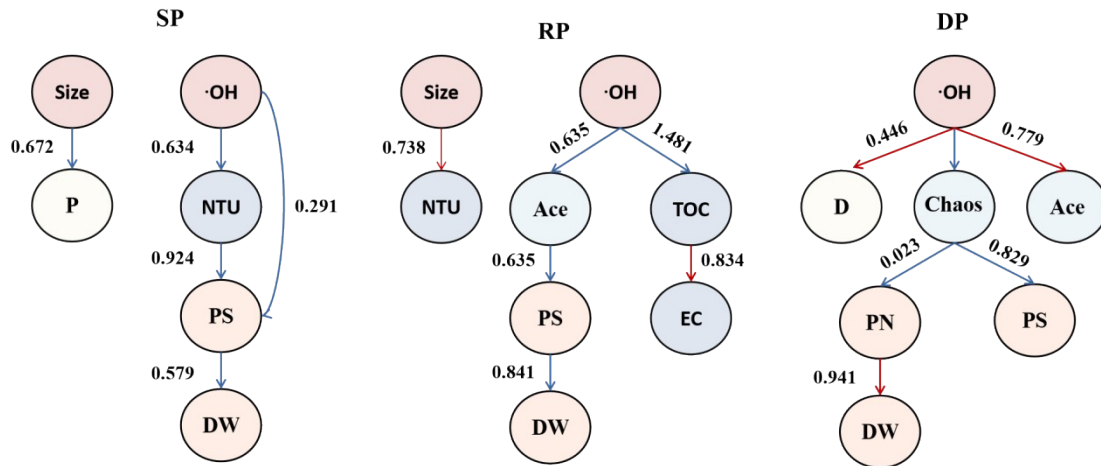

Figure S2. Micro/Nanobubble Biofilm Control Pathway

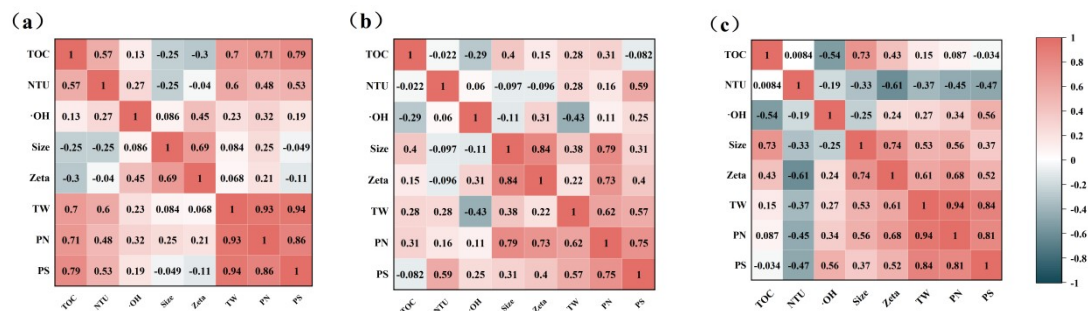

Figure S3. Correlation analysis of water quality-related indexes under micro-nano bubble treatment at different stages. (a) SP (b) RP (c) DP.
